# Supplementary material for: Integrating coupled surface–subsurface modeling and field measurements: insights for rewetting a degraded fen peatland
Source: Copernicus journal article supplement (doi:10.5194/egusphere-2025-6200), 2026-02-03
Supplement: Supplementary file 1 [file egusphere-2025-6200-supplement.pdf]

# Integrating coupled surface–subsurface modeling and field measurements: insights for rewetting a degraded fen peatland

Nariman Mahmoodi<sup>1</sup>, Ottfried Dietrich<sup>1</sup>, Jürgen Pickert<sup>2</sup>, Christoph Merz<sup>1</sup>

<sup>1</sup> Lowland Hydrology and Water Management Group, Leibniz Centre for Agricultural Landscape Research (ZALF), Eberswalder Straße 84, 15374 Muencheberg, Germany

<sup>2</sup> Sustainable Grassland Systems Group, Leibniz Centre for Agricultural Landscape Research (ZALF), Eberswalder Straße 84, 15374 Muencheberg, Germany

Corresponding author: Nariman Mahmoodi (nariman.mahmoodi@zalf.de)

## Supplementary material

**Table S1.** Management units and their vegetation growth stages and associated LAI and biomass measurements in the year 2015

| Management Units | Date       | Status       |              |            |               |             |               | Sward height<br>m | LAI<br>-- | FM-Biomass <sup>1</sup><br>t FM ha-1 | DM-Biomass <sup>2</sup><br>t DM ha-1 |
|------------------|------------|--------------|--------------|------------|---------------|-------------|---------------|-------------------|-----------|--------------------------------------|--------------------------------------|
|                  |            | start growth | start mowing | end mowing | start grazing | end grazing | end re-mowing |                   |           |                                      |                                      |
| 1                | 4/10/2015  | *            |              |            |               |             |               | 0                 | 0.0       | 0                                    | 0                                    |
|                  | 7/31/2015  |              | *            |            |               |             |               | 60                | 7.6       | 21.3                                 | 4.5                                  |
|                  | 7/31/2015  |              |              | *          |               |             |               | 0                 | 0.0       | 0                                    | 0                                    |
|                  | 11/9/2015  |              | *            |            |               |             |               | 40                | 5.0       | 15                                   | 4                                    |
|                  | 11/9/2015  |              |              | *          |               |             |               | 0                 | 0.0       | 0                                    | 0                                    |
| 2                | 4/10/2015  | *            |              |            |               |             |               | 0                 | 0.0       | 0                                    | 0                                    |
|                  | 6/8/2015   |              | *            |            |               |             |               | 60                | 7.0       | 20.0                                 | 6.0                                  |
|                  | 6/8/2015   |              |              | *          |               |             |               | 0                 | 0.0       | 0                                    | 0                                    |
|                  | 7/31/2015  |              |              |            | *             |             |               | 60                | 7.6       | 14.9                                 | 3.6                                  |
|                  | 9/4/2015   |              |              |            |               | *           |               | 0                 | 0.0       | 0                                    | 0                                    |
|                  | 10/8/2015  |              |              |            | *             |             |               | 35                | 5.9       | 8.5                                  | 2.1                                  |
|                  | 10/15/2015 |              |              |            |               | *           |               | 0                 | 0.0       | 0                                    | 0                                    |
|                  | 11/3/2015  |              |              |            | *             |             |               | 20                | 2.0       | 1.0                                  | 0.25                                 |
|                  | 11/6/2015  |              |              |            |               | *           |               | 0                 | 0.0       | 0                                    | 0                                    |
| 3                | 4/10/2015  | *            |              |            |               |             |               | 0                 | 0.0       | 0                                    | 0                                    |
|                  | 6/10/2015  |              | *            |            |               |             |               | 60                | 7.0       | 20.0                                 | 6.0                                  |
|                  | 6/10/2015  |              |              | *          |               |             |               | 0                 | 0.0       | 0                                    | 0                                    |
|                  | 7/31/2015  |              | *            |            |               |             |               | 60                | 7.6       | 21.3                                 | 4.5                                  |

|          |            |   |   |   |    |     |      |      |
|----------|------------|---|---|---|----|-----|------|------|
|          | 7/31/2015  |   | * |   | 20 | 2.0 | 1.0  | 0.25 |
|          | 11/9/2015  | * |   |   | 35 | 6.0 | 8.5  | 2.10 |
|          | 11/9/2015  |   | * |   | 0  | 0.0 | 0    | 0    |
| <b>4</b> | 4/10/2015  | * |   |   | 0  | 0   | 0    | 0    |
|          | 6/30/2015  |   |   | * | 60 | 7.0 | 20.6 | 6.2  |
|          | 7/31/2015  |   |   | * | 20 | 2.0 | 1.0  | 0.25 |
|          | 8/3/2015   |   |   |   | 0  | 0.0 | 0    | 0    |
|          | 9/25/2015  |   |   | * | 30 | 6.3 | 12.8 | 2.6  |
|          | 10/15/2015 |   |   | * | 0  | 0.0 | 0    | 0    |
|          | 11/3/2015  |   |   | * | 20 | 2.0 | 1.0  | 0.25 |
|          | 11/6/2015  |   |   | * | 0  | 0.0 | 0    | 0    |
| <b>5</b> | 4/10/2015  | * |   |   | 0  | 0.0 | 0    | 0    |
|          | 6/10/2015  | * |   |   | 60 | 7.6 | 21.3 | 4.5  |
|          | 6/10/2015  |   | * |   | 0  | 0.0 | 0    | 0    |
|          | 7/31/2015  | * |   |   | 60 | 7.6 | 21.3 | 4.5  |
|          | 7/31/2015  |   | * |   | 0  | 0.0 | 0    | 0    |
|          | 10/15/2015 |   |   | * | 45 | 7.1 | 20   | 4    |
|          | 11/3/2015  |   |   | * | 20 | 2.0 | 1.0  | 0.25 |
|          | 11/11/2015 |   |   | * | 0  | 0.0 | 0    | 0    |
| <b>6</b> | 4/10/2015  | * |   |   | 0  | 0.0 | 0    | 0    |
|          | 6/10/2015  | * |   |   | 60 | 7.6 | 21.3 | 4.5  |
|          | 6/10/2015  |   | * |   | 0  | 0.0 | 0    | 0    |
|          | 7/31/2015  | * |   |   | 60 | 7.6 | 21.3 | 4.5  |
|          | 7/31/2015  |   | * |   | 0  | 0.0 | 0    | 0    |
|          | 11/10/2015 | * |   |   | 30 | 6.0 | 12   | 3    |
|          | 11/10/2015 |   | * |   | 0  | 0.0 | 0    | 0    |
| <b>7</b> | 4/10/2015  | * |   |   | 0  | 0.0 | 0    | 0    |
|          | 6/10/2015  | * |   |   | 60 | 7.6 | 21.3 | 4.5  |
|          | 6/10/2015  |   | * |   | 0  | 0.0 | 0    | 0    |
|          | 7/31/2015  | * |   |   | 60 | 7.6 | 21.3 | 4.5  |
|          | 7/31/2015  |   | * |   | 0  | 0.0 | 0    | 0    |
|          | 10/15/2015 |   |   | * | 45 | 7.1 | 15   | 4    |
|          | 11/3/2015  |   |   | * | 20 | 2.0 | 1.0  | 0.25 |
|          | 11/11/2015 |   |   | * | 0  | 0.0 | 0    | 0    |
| <b>8</b> | 4/10/2015  | * |   |   | 0  | 0.0 | 0    | 0    |
|          | 5/21/2015  |   |   | * | 50 | 5.5 | 10.5 | 2.5  |
|          | 6/17/2015  |   |   | * | 0  | 0.0 | 0    | 0    |
|          | 9/4/2015   |   |   | * | 35 | 7.5 | 15.1 | 3.4  |
|          | 9/24/2015  |   |   | * | 0  | 0.0 | 0    | 0    |
|          | 11/10/2015 | * |   |   | 30 | 6.0 | 12   | 3    |
|          | 11/10/2015 |   | * |   | 0  | 0.0 | 0    | 0    |

<sup>1</sup> Fresh Matter Biomass

<sup>2</sup> Dry Matter Biomass
